# Supplementary material for: Human and Animal Brucellosis in Nigeria: A Systemic Review and Meta-Analysis in the Last Twenty-One Years (2001–2021)
Source: MDPI journal article supplement (doi:10.3390/vetsci9080384), 2022-07-26
Supplement: s1 [file s1]

**Supplementary Table S1. Published report on Human and Animal brucellosis in Nigeria (2001–2021).**

| Zone<br>(Region) | State    | Reference | Years of study | Sample<br>source | Type of<br>sample | No of<br>sample | Positive<br>sample | Method of detection     | Specie<br>type  | B.<br>abortus | B.<br>melitensis | B.<br>suis | B.<br>canis |
|------------------|----------|-----------|----------------|------------------|-------------------|-----------------|--------------------|-------------------------|-----------------|---------------|------------------|------------|-------------|
|                  |          |           |                |                  |                   |                 |                    |                         | Brucella<br>spp |               |                  |            |             |
| NC               | FCT      | [14]      | 2017           | Cattle           | blood             | 376             | 21                 | RBPT, cELISA,           | 21              | 0             | 0                | 0          | 0           |
|                  |          |           |                | Goat             | blood             | 203             | 19                 | RBPT, cELISA,           | 19              | 0             | 0                | 0          | 0           |
|                  |          |           |                | Sheep            | blood             | 260             | 113                | RBPT, cELISA,           | 113             | 0             | 0                | 0          | 0           |
|                  | Benue    | [15]      | 2011 and 2013  | Goat             | blood             | 331             | 57                 | RBPT, Culture,          | 0               | 57            | 0                | 0          | 0           |
|                  | Plateau  | [16]      | 2010           | Horse            | blood             | 22              | 5                  | RBPT                    | 0               | 5             | 0                | 0          | 0           |
|                  | Niger    | [17]      | 2016           | Cattle           | blood             | 672             | 13                 | LFA                     | 0               | 13            | 0                | 0          | 0           |
|                  | Plateau  | [18]      | 2009           | Sheep            | blood             | 496             | 72                 | RBPT, SAT               | 72              | 0             | 0                | 0          | 0           |
|                  |          |           |                | Goat             | blood             | 851             | 137                | RBPT, SAT               | 137             | 0             | 0                | 0          | 0           |
|                  | Kwara    | [19]      | 2020           | Human            | blood             | 189             | 42                 | RBPT, iELISA,           | 42              | 0             | 0                | 0          | 0           |
|                  |          |           |                | Cattle           | blood             | 394             | 38                 | RBPT, iELISA,           | 38              | 0             | 0                | 0          | 0           |
|                  | Kwara    | [20]      | 2019           | Horse            | blood             | 48              | 8                  | RBPT                    | 8               | 0             | 0                | 0          | 0           |
|                  | Plateau  | [21]      | 2020           | Cattle           | vaginal swab      | 70              | 11                 | Culture                 | 0               | 11            | 0                | 0          | 0           |
|                  |          |           |                |                  | milk              | 50              | 0                  | Culture                 | 0               | 0             | 0                | 0          | 0           |
|                  |          |           |                |                  | hygroma fluid     | 2               | 0                  | Culture                 | 0               | 0             | 0                | 0          | 0           |
|                  | Benue    | [22]      | 2018           | Dog              | blood             | 102             | 2                  | RBT, SAT                | 2               | 0             | 0                | 0          | 0           |
|                  | Plateau  | [23]      | 2020           | Cattle           | milk              | 200             | 27                 | MSA                     | 27              | 0             | 0                | 0          | 0           |
|                  | Plateau  | [24]      | 2011           | Cattle           | blood             | 158             | 6                  | RBPT                    | 0               | 6             | 0                | 0          | 0           |
|                  | Plateau  | [25]      | 2014           | Dog              | blood             | 350             | 113                | RBPT                    | 113             | 0             | 0                | 0          | 0           |
|                  | Plateau  | [26]      | 2017           | Cattle           | blood             | 479             | 18                 | RBPT, SAT               | 18              | 0             | 0                | 0          | 0           |
|                  | Plateau  | [27]      | 2014           | Sheep            | blood             | 50              | 14                 | RBPT                    | 14              | 0             | 0                | 0          | 0           |
|                  |          |           |                | Goat             |                   | 50              | 31                 | RBPT                    | 31              | 0             | 0                | 0          | 0           |
|                  | Niger    | [28]      | 2011           | Cattle           | Blood             | 87              | 9                  | RBPT                    | 0               | 9             | 0                | 0          | 0           |
|                  | Nasarawa | [29]      | 2017           | Goat/sheep       | blood             | 256             | 64                 | RBPT, cELISA,           | 64              | 0             | 0                | 0          | 0           |
|                  | FCT      | [30]      |                | Human            | Blood             | 224             | 40                 | RBPT, IgG, IgM<br>ELISA | 40              | 0             | 0                | 0          | 0           |
|                  | Nasarawa | [31]      | 2018           | Human            | Blood             | 160             | 16                 | RBPT                    | 16              | 0             | 0                | 0          | 0           |
|                  | Benue    | [32]      | 2013           | Pig              | Blood             | 281             | 86                 | RBPT                    | 86              | 0             | 0                | 0          | 0           |
|                  | Plateau  | [33]      | 2015           | Horse            | blood             | 7               | 7                  | RBPT, SAT               | 0               | 7             | 0                | 0          | 0           |
|                  |          |           |                | Cattle           | blood             | 44              | 19                 | RBPT, SAT               | 0               | 19            | 0                | 0          | 0           |
|                  |          |           |                | Sheep            | blood             | 32              | 4                  | RBPT, SAT               | 0               | 4             | 0                | 0          | 0           |
|                  |          |           |                | Goat             | blood             | 50              | 5                  | RBPT, SAT               | 0               | 5             | 0                | 0          | 0           |
|                  |          |           |                | Cattle           | milk              | 12              | 3                  | Culture                 | 0               | 3             | 0                | 0          | 0           |
|                  |          |           |                | Sheep            | milk              | 10              | 0                  | Culture                 | 0               | 0             | 0                | 0          | 0           |
|                  |          |           |                | Goat             | milk              | 10              | 0                  | Culture                 | 0               | 0             | 0                | 0          | 0           |
|                  |          |           |                | Horse            | vaginal swab      | 6               | 2                  | Culture                 | 0               | 2             | 0                | 0          | 0           |

[illegible]

|    |              |      |               |         |               |      |     |                                        |     |    |    |   |   |
|----|--------------|------|---------------|---------|---------------|------|-----|----------------------------------------|-----|----|----|---|---|
| NE | Borno        | [38] | 2013-2014     | Donkey  | blood         | 601  | 43  | RBPT, iELISA,                          | 43  | 0  | 0  | 0 | 0 |
|    | Yobe         | [39] | 2020          | Donkey  | blood         | 200  | 43  | RBPT, cELISA,                          | 43  | 0  | 0  | 0 | 0 |
|    | Adamawa      | [40] | 2008-2009     | Cattle  | blood         | 87   | 192 | RBPT                                   | 192 | 0  | 0  | 0 | 0 |
|    | Borno        | [41] | 2014          | CHICKEN | blood         | 556  | 10  | RBPT, MAT                              | 10  | 0  | 0  | 0 | 0 |
|    |              |      |               | G. fowl | blood         | 84   | 6   | RBPT, MAT                              | 6   | 0  | 0  | 0 | 0 |
|    |              |      |               | DUCK    | blood         | 50   | 2   | RBPT, MAT                              | 2   | 0  | 0  | 0 | 0 |
|    |              |      |               | TURKEY  | blood         | 40   | 0   | RBPT, MAT                              | 0   | 0  | 0  | 0 | 0 |
|    | Bauchi       | [42] | 2001          | sheep   | blood         | 28   | 4   | RBPT, SAT                              | 4   | 0  | 0  | 0 | 0 |
|    |              |      |               |         | milk          | 5    | 5   | MRT, Culture                           | 5   | 0  | 0  | 0 | 0 |
|    |              |      |               | Ewe     | vaginal swab  | 5    | 3   | Culture                                | 3   | 0  | 0  | 0 | 0 |
|    |              |      |               | Cattle  | blood         | 20   | 20  | RBPT                                   | 20  | 0  | 0  | 0 | 0 |
|    | Borno        | [15] | 2011 and 2013 | Goat    | blood         | 195  | 4   | RBPT                                   | 4   | 0  | 0  | 0 | 0 |
|    | Taraba       | [43] | 2018          | Goat    | blood         | 386  | 37  | RBPR                                   | 37  | 0  | 0  | 0 | 0 |
|    | Gombe        | [44] | 2016          | Cattle  | blood         | 200  | 18  | RBPT, SAT, MAT                         | 0   | 18 | 0  | 0 | 0 |
|    | Not reported | [45] | 2001          | Human   | blood         | 500  | 26  | SAT                                    | 26  | 0  | 0  | 0 | 0 |
|    | Taraba       | [46] |               | Horse   | blood         | 100  | 16  | RBPT, SAT                              | 16  | 0  | 0  | 0 | 0 |
|    | Borno        | [47] | 2010          | Carmel  | blood         | 511  | 62  | RBPT, MSA                              | 62  | 0  | 0  | 0 | 0 |
|    | Adamawa      | [48] | 2008-2009     | Cattle  | blood         | 1827 | 332 | RBPT, cELISA,                          | 332 | 0  | 0  | 0 | 0 |
|    | Bauchi       | [49] | 2019          | Cattle  | blood         | 1000 | 235 | RBPT, cELISA,                          | 235 | 0  | 0  | 0 | 0 |
|    | Borno        | [50] | 2017          | Human   | blood         | 106  | 4   | RBPT                                   | 4   | 0  | 0  | 0 | 0 |
|    | Borno        | [51] | 2010          | Camel   | blood         | 257  | 38  | RBPT, SAT                              | 38  | 0  | 0  | 0 | 0 |
|    | Gombe        | [52] | 2017          | Dog     | blood         | 374  | 76  | RBPT, cELISA,                          | 0   | 76 | 0  | 0 | 0 |
|    | Bauchi       | [53] | 2013-2014     | Cattle  | blood         | 366  | 18  | RBPT, SAT                              | 18  | 0  | 0  | 0 | 0 |
|    | Yobe         | [54] |               | Camel   | blood         | 400  | 298 | MSAT                                   | 298 | 0  | 0  | 0 | 0 |
|    | Yobe         | [55] | 2013          | Donkey  | blood         | 300  | 15  | RBPT, cELISA, MSAT                     | 15  | 0  | 0  | 0 | 0 |
|    | Borno        | [56] | 2015          | Human   | Blood         | 100  | 11  | RBPT                                   | 0   | 11 | 0  | 0 | 0 |
|    | Bauchi       | [57] | 2020          | Human   | Blood         | 284  | 95  | RBPT, IgG ELISA,<br>IgM ELISA, IgG/IgM | 95  | 0  | 0  | 0 | 0 |
|    | Borno        | [58] | 2016          | Carmel  | blood         | 99   | 0   | RBPT, LFA                              | 0   | 0  | 0  | 0 | 0 |
|    | Borno        | [59] | 2012          | Goat    | blood         | 250  | 34  | RBPT, CFT                              | 0   | 12 | 22 | 0 | 0 |
|    | Sokoto       | [60] | 2008          | Cattle  | blood         | 1547 | 305 | RBPT, cELISA, SAT                      | 305 | 0  | 0  | 0 | 0 |
|    |              |      |               |         | milk          | 99   | 25  | MRT                                    | 25  | 0  | 0  | 0 | 0 |
|    | Bauchi       | [36] |               | Cattle  | Vaginal swabs | 5    | 3   | Culture                                | 0   | 3  | 0  | 0 | 0 |
|    |              |      |               | Cattle  | milk          | 5    | 2   | Culture                                | 0   | 2  | 0  | 0 | 0 |
|    |              |      |               | Cattle  | hygroma fluid | 0    | 0   | Culture                                | 0   | 0  | 0  | 0 | 0 |
|    |              |      |               | Cattle  | blood         | 0    | 0   | Culture                                | 0   | 0  | 0  | 0 | 0 |
|    |              |      |               | Sheep   | Vaginal swabs | 0    | 0   | Culture                                | 0   | 0  | 0  | 0 | 0 |
|    |              |      |               | Sheep   | milk          | 3    | 2   | Culture                                | 0   | 2  | 0  | 0 | 0 |
|    | Adamawa      | [36] |               | Cattle  | Vaginal swabs | 3    | 0   | Culture                                | 0   | 0  | 0  | 0 | 0 |
|    |              |      |               | Cattle  | milk          | 3    | 0   | Culture                                | 0   | 0  | 0  | 0 | 0 |
|    |              |      |               | Cattle  | hygroma fluid | 3    | 2   | Culture                                | 0   | 2  | 0  | 0 | 0 |

|       |         |      |               |        |               |        |      |                   |      |     |    |    |   |
|-------|---------|------|---------------|--------|---------------|--------|------|-------------------|------|-----|----|----|---|
|       |         |      |               | Cattle | blood         | 0      | 0    | Culture           | 0    | 0   | 0  | 0  | 0 |
|       |         |      |               | Sheep  | vaginal swabs | 9      | 0    | Culture           | 0    | 0   | 0  | 0  | 0 |
|       | Taraba  | [36] |               | Cattle | Vaginal swabs | 0      | 0    | Culture           | 0    | 0   | 0  | 0  | 0 |
|       |         |      |               | Cattle | milk          | 0      | 0    | Culture           | 0    | 0   | 0  | 0  | 0 |
|       |         |      |               | Cattle | hygroma fluid | 3      | 2    | Culture           | 0    | 2   | 0  | 0  | 0 |
|       |         |      |               | Cattle | blood         | 0      | 0    | Culture           | 0    | 0   | 0  | 0  | 0 |
|       | Borno   | [36] |               | Cattle | Vaginal swabs | 48     | 0    | Culture           | 0    | 0   | 0  | 0  | 0 |
|       |         |      |               | Cattle | milk          | 37     | 0    | Culture           | 0    | 0   | 0  | 0  | 0 |
|       |         |      |               | Cattle | hygroma fluid | 0      | 0    | Culture           | 0    | 0   | 0  | 0  | 0 |
|       |         |      |               | Cattle | blood         | 0      | 0    | Culture           | 0    | 0   | 0  | 0  | 0 |
|       |         |      |               | Sheep  | Vaginal swabs | 7      | 0    | Culture           | 0    | 0   | 0  | 0  | 0 |
|       | Bauchi  | [61] | 2019          | Donkey | blood         | 1000   | 114  | RBPT, SAT         | 114  | 0   | 0  | 0  | 0 |
|       |         | [62] | 2011-2013     | Cattle | blood         | *      | *    |                   |      |     |    |    |   |
| Total |         |      |               |        |               | 11,703 | 2102 |                   | 1952 | 128 | 22 | 0  | 0 |
|       |         |      |               |        |               |        |      |                   |      |     |    |    |   |
| NW    | Katsina | [63] | 2017          | Camel  | blood         | 980    | 110  | RBPT, SAT         | 110  | 0   | 0  | 0  | 0 |
|       | kaduna  | [64] | 2018          | Cattle | blood         | 400    | 74   | RBPT, cELISA,     | 74   | 0   | 0  | 0  | 0 |
|       | Kaduna  | [40] | 2008-2009     | Cattle | blood         | 98     | 0    | RBPT              | 0    | 0   | 0  | 0  | 0 |
|       | Kano    | [40] | 2008-2009     | Cattle | blood         | 66     | 0    | RBPT              | 0    | 0   | 0  | 0  | 0 |
|       | Sokoto  | [15] | 2011 and 2013 | Goat   | blood         | 146    | 0    | RBPT              | 0    | 0   | 0  | 0  | 0 |
|       | Kaduna  | [16] | 2010          | Horse  | blood         | 53     | 6    | RBPT              | 0    | 6   | 0  | 0  | 0 |
|       | Sokoto  | [62] | 2011-2013     | Cattle | blood         | 2356   | 90   | RBPT              | 0    | 90  | 0  | 0  | 0 |
|       | kaduna  | [65] |               | Goat   | blood         | 422    | 114  | RBPT, SAT, LFA    | 114  | 0   | 0  | 0  | 0 |
|       | kaduna  | [66] | 2007          | Human  | blood         | 1      | 1    | cELISA            | 0    | 1   | 0  | 0  | 0 |
|       | Jigawa  | [67] |               | Cattle | blood         | 570    | 23   | RBPT, cELISA,     | 23   | 0   | 0  | 0  | 0 |
|       | Sokoto  | [68] |               | Sheep  | blood         | 720    | 170  | RBPT, SAT, cELISA | 170  | 0   | 0  | 0  | 0 |
|       | kaduna  | [69] | 2016          | Cattle | blood         | 500    | 14   | RBPT, SAT         | 14   | 0   | 0  | 0  | 0 |
|       | kaduna  | [48] | 2008-2009     | Cattle | blood         | 1048   | 892  | RBPT, cELISA,     | 892  | 0   | 0  | 0  | 0 |
|       | KANO    | [48] | 2008-2009     | Cattle | blood         | 1870   | 511  | RBPT, cELISA,     | 511  | 0   | 0  | 0  | 0 |
|       | kaduna  | [70] | 2012          | Sheep  | blood         | 5      | 1    | RBPT, SAT         | 0    | 1   | 0  | 0  | 0 |
|       | Kaduna  | [21] | 2020          | Cattle | vaginal swab  | 63     | 0    |                   | 0    | 0   | 0  | 0  | 0 |
|       |         |      |               |        | milk          | 36     | 0    |                   | 0    | 0   | 0  | 0  | 0 |
|       |         |      |               |        | hygroma fluid | 2      | 0    |                   | 0    | 0   | 0  | 0  | 0 |
|       | Sokoto  | [71] |               | Horse  | Blood         | 347    | 48   | RBPT, SAT, cELISA | 48   | 0   | 0  | 0  | 0 |
|       | kaduna  | [72] | 2017          | Human  | blood         | 100    | 19   | iELISA,           | 19   | 0   | 0  | 0  | 0 |
|       | kaduna  | [73] | 2018          | Sheep  | blood         | 400    | 100  | cELISA            | 0    | 57  | 43 | 0  | 0 |
|       | Jigawa  | [74] | 2020          | Cattle | blood         | 1810   | 61   | SAT               | 61   | 0   | 0  | 0  | 0 |
|       | kaduna  | [75] |               | Sheep  | Blood         | 17     | 13   | RBPT, SAT         | 13   | 0   | 0  | 0  | 0 |
|       | Sokoto  | [76] | 2021          | Human  | Blood         | 137    | 1    | RBPT, cELISA,     | 0    | 1   | 0  | 0  | 0 |
|       |         |      |               | Cattle | Blood         | 366    | 19   | RBPT, cELISA,     | 0    | 19  | 0  | 0  | 0 |
|       | Sokoto  | [77] | 2019          | Sheep  | blood         | 169    | 40   | cELISA            | 0    | 0   | 0  | 40 | 0 |

|  |         |      |           |        |               |      |     |                    |     |    |   |    |   |
|--|---------|------|-----------|--------|---------------|------|-----|--------------------|-----|----|---|----|---|
|  | Katsina | [77] | 2019      | Sheep  | blood         |      |     |                    |     |    |   |    |   |
|  | Sokoto  | [77] | 2019      | Goat   | blood         | 231  | 28  | cELISA             | 0   | 0  | 0 | 28 | 0 |
|  | Katsina | [77] | 2019      | Goat   | blood         |      |     |                    |     |    |   |    |   |
|  | Sokoto  | [78] | 2019      | Cattle | lymph node    | 170  | 50  | PCR                | 0   | 50 | 0 | 0  | 0 |
|  | Sokoto  | [79] | 2006      | Cattle | blood         | 1711 | 395 | RBPT, SAT, cELISA, | 395 | 0  | 0 | 0  | 0 |
|  | Kaduna  | [80] | 2017      | Goat   | blood         | 768  | 39  | RBPT, SAT          | 39  | 0  | 0 | 0  | 0 |
|  |         |      |           | Sheep  | blood         | 268  | 27  | RBPT, SAT          | 27  | 0  | 0 | 0  | 0 |
|  | Kaduna  | [81] | 2014-2015 | Goat   | blood         | 280  | 23  | RBPT, cELISA,      | 23  | 0  | 0 | 0  | 0 |
|  |         |      |           |        | milk          | 113  | 43  | MRT                | 43  | 0  | 0 | 0  | 0 |
|  | Taraba  | [82] | 2014      | cattle | blood         | 150  | 32  | RBPT               | 0   | 32 | 0 | 0  | 0 |
|  |         |      |           | Goat   | blood         | 90   | 10  | RBPT               | 0   | 10 | 0 | 0  | 0 |
|  |         |      |           | Sheep  | blood         | 90   | 18  | RBPT               | 0   | 18 | 0 | 0  | 0 |
|  |         |      |           | Cow    | milk          | 225  | 17  | MRT                | 0   | 17 | 0 | 0  | 0 |
|  | Jigawa  | [83] | 2017      | Cattle | blood         | 1867 | 83  | SAT                | 83  | 0  | 0 | 0  | 0 |
|  |         |      |           |        | milk          | 869  | 61  | WAT                | 61  | 0  | 0 | 0  | 0 |
|  | Zamfara | [84] |           | Cattle | blood         | 320  | 64  | iELISA,            | 0   | 64 | 0 | 0  | 0 |
|  | Kaduna  | [85] | 2015      | Sheep  | blood         | 579  | 153 | RBPT, SAT, LFA     | 153 | 0  | 0 | 0  | 0 |
|  | kaduna  | [86] | 2003      | sheep  | milk          | 94   | 14  | MRT                | 14  | 0  | 0 | 0  | 0 |
|  |         |      |           | Goat   | milk          | 60   | 24  | MRT                | 24  | 0  | 0 | 0  | 0 |
|  | Katsina | [86] |           | Sheep  | milk          | 48   | 6   | MRT                | 6   | 0  | 0 | 0  | 0 |
|  |         |      |           | Goat   | milk          | 10   | 1   | MRT                | 1   | 0  | 0 | 0  | 0 |
|  | Kano    | [86] |           | Sheep  | milk          | 59   | 20  | MRT                | 20  | 0  | 0 | 0  | 0 |
|  |         |      |           | Goat   | milk          | 12   | 4   | MRT                | 4   | 0  | 0 | 0  | 0 |
|  | Sokoto  | [86] |           | Goat   | milk          | 59   | 17  | MRT                | 17  | 0  | 0 | 0  | 0 |
|  | Kano    | [58] | 2016      | Camel  | blood         | 180  | 4   | RBPT, LFA          | 0   | 4  | 0 | 0  | 0 |
|  | Sokoto  | [86] |           |        |               | 32   | 2   | RBPT, LFA          | 0   | 2  | 0 | 0  | 0 |
|  | Kaduna  | [87] |           | Cattle | blood         | 2799 | 198 | RBPT, SAT          | 198 | 0  | 0 | 0  | 0 |
|  |         |      |           |        | milk          | 2149 | 31  | MRT                | 31  | 0  | 0 | 0  | 0 |
|  | Kaduna  | [88] | 2004      | Dog    | blood         | 200  | 43  | RBPT, SAT          | 0   | 43 | 0 | 0  | 0 |
|  | Kaduna  | [36] | 2004      | Cattle | Vaginal swabs | 3    | 0   | Culture            | 0   | 0  | 0 | 0  | 0 |
|  |         |      |           | Cattle | milk          | 5    | 0   | Culture            | 0   | 0  | 0 | 0  | 0 |
|  |         |      |           | Cattle | hygroma fluid | 0    | 0   | Culture            | 0   | 0  | 0 | 0  | 0 |
|  |         |      |           | Cattle | blood         | 0    | 0   | Culture            | 0   | 0  | 0 | 0  | 0 |
|  | Kano    | [36] | 2004      | Cattle | Vaginal swabs | 23   | 0   | Culture            | 0   | 0  | 0 | 0  | 0 |
|  |         |      |           | Cattle | milk          | 17   | 0   | Culture            | 0   | 0  | 0 | 0  | 0 |
|  |         |      |           | Cattle | hygroma fluid | 0    | 0   | Culture            | 0   | 0  | 0 | 0  | 0 |
|  |         |      |           | Cattle | blood         | 60   | 0   | Culture            | 0   | 0  | 0 | 0  | 0 |
|  | Sokoto  | [36] | 2004      | Cattle | Vaginal swabs | 72   | 0   | Culture            | 0   | 0  | 0 | 0  | 0 |
|  |         |      |           | Cattle | milk          | 6    | 2   | Culture            | 0   | 2  | 0 | 0  | 0 |
|  |         |      |           | Cattle | hygroma fluid | 0    | 0   | Culture            | 0   | 0  | 0 | 0  | 0 |

|       |           |       |               |         |               |        |      |                     |      |     |     |    |    |
|-------|-----------|-------|---------------|---------|---------------|--------|------|---------------------|------|-----|-----|----|----|
|       |           |       |               | Cattle  | blood         | 17     | 0    | Culture             | 0    | 0   | 0   | 0  | 0  |
| Total |           |       |               |         |               | 26,318 | 3716 |                     | 3188 | 417 | 43  | 68 | 0  |
| SE    | Enugu     | [89]  | 2018          | Cattle  | blood         | 484    | 14   | RBPT                | 14   | 0   | 0   | 0  | 0  |
|       |           |       |               | Goat    | blood         | 340    | 12   | RBPT                | 12   | 0   | 0   | 0  | 0  |
|       | Ebonyi    | [62]  | 2011-2013     | Cattle  | blood         | 1082   | 37   | RBPT                | 0    | 37  | 0   | 0  | 0  |
|       | Enugu     | [90]  | 2020          | Dog     | blood         | 68     | 34   | Immunocomb          | 0    | 0   | 0   | 0  | 34 |
|       | Anambra   | [90]  | 2020          | Dog     | blood         | 55     | 0    | Immunocomb          | 0    | 0   | 0   | 0  | 0  |
|       | Enugu     | [91]  | 2015-2016     | Human   | Blood         | 682    | 195  | RBPT                | 195  | 0   | 0   | 0  | 0  |
|       | Anambra   | [92]  |               | Chicken | blood         | 410    | 14   | RBPT                | 14   | 0   | 0   | 0  | 0  |
|       | Anambra   | [93]  | 2011          | pig     | blood         | 139    | 0    | RBPT                | 0    | 0   | 0   | 0  | 0  |
|       | Enugu     | [93]  | 2011          | pig     | blood         | 183    | 2    | RBPT                | 2    | 0   | 0   | 0  | 0  |
|       | Ebonyi    | [93]  | 2011          | pig     | blood         | 29     | 0    | RBPT                | 0    | 0   | 0   | 0  | 0  |
|       | Enugu     | [36]  |               | Cattle  | hygroma fluid | 1      | 0    | Culture             | 0    | 0   | 0   | 0  | 0  |
|       | Enugu     | [94]  | 2018          | horse   | blood         | 402    | 12   | RBPT                | 12   | 0   | 0   | 0  | 0  |
| Total |           |       |               |         |               | 3875   | 320  |                     | 249  | 37  | 0   | 0  | 34 |
| SS    | Edo       | [95]  |               | Pig     | blood         | 30     | 81   | Culture             | 0    | 24  | 27  | 30 | 0  |
|       |           |       |               |         | swab          | 25     | 68   | Culture             | 0    | 19  | 24  | 25 | 0  |
|       | Akwa Ibom | [96]  | 2019          | Human   | Blood         | 228    | 70   | RBPT, IgG-IgM-ELISA | 0    | 0   | 70  | 0  | 0  |
|       | C. River  | [97]  | 2013          | Cattle  | blood         | 354    | 149  | RBPT, Culture       | 149  | 0   | 0   | 0  | 0  |
|       |           |       |               |         | Vaginal swabs | 14     | 1    | Culture             | 0    | 1   | 0   | 0  | 0  |
|       |           |       |               |         | hygroma fluid | 1      | 1    | Culture             | 0    | 1   | 0   | 0  | 0  |
|       | Edo       | [62]  | 2011-2013     | Cattle  | blood         | *      | *    |                     |      |     |     |    |    |
| Total |           |       |               |         |               | 652    | 370  |                     | 149  | 45  | 121 | 55 | 0  |
| SW    | Lagos     | [98]  | 2011          | DOG     | blood         | 183    | 18   | RBPT, RSA           | 0    | 17  | 0   | 0  | 1  |
|       | Oyo       | [98]  | 2011          | DOG     | blood         | 180    | 3    | RBPT, RSA           | 0    | 3   | 0   | 0  | 0  |
|       | Oyo       | [99]  | 2013          | Cattle  | blood         | 1,241  | 97   | RBPT, iELISA,       | 97   | 0   | 0   | 0  | 0  |
|       |           |       |               |         | milk          | 57     | 19   | RBPT, iELISA, MRT   | 19   | 0   | 0   | 0  | 0  |
|       | Oyo       | [15]  | 2011 and 2013 | Goat    | blood         | 2155   | 13   | RBPT                | 13   | 0   | 0   | 0  | 0  |
|       | Lagos     | [62]  | 2011-2013     | Cattle  | blood         | 4667   | 188  | RBPT                | 0    | 188 | 0   | 0  | 0  |
|       | Ogun      |       |               |         |               | *      |      |                     |      |     |     |    |    |
|       | Oyo       |       |               |         |               | *      |      |                     |      |     |     |    |    |
|       | Lagos     | [100] | 2018          | Cattle  | blood         | 221    | 38   | RBPT, iELISA,       | 38   | 0   | 0   | 0  | 0  |
|       |           |       |               | Goat    | blood         | 192    | 29   | RBPT, iELISA,       | 29   | 0   | 0   | 0  | 0  |
|       |           |       |               | sheep   | blood         | 60     | 14   | RBPT, iELISA,       | 14   | 0   | 0   | 0  | 0  |
|       | Oyo       | [7]   | 2018          | Cattle  | blood         | 149    | 17   | RBPT, cELISA,       | 17   | 0   | 0   | 0  | 0  |

|             |       |       |           |           |          |        |      |               |      |      |     |     |    |
|-------------|-------|-------|-----------|-----------|----------|--------|------|---------------|------|------|-----|-----|----|
|             | ogun  | [101] |           | Cattle    | blood    | 279    | 24   | RBPT, cELISA, | 24   | 0    | 0   | 0   | 0  |
|             | Oyo   | [102] |           | Cattle    | blood    | 174    | 6    | RBPT, cELISA, | 0    | 6    | 0   | 0   | 0  |
|             | Oyo   | [103] | 2008      | Cattle    | cow milk | 532    | 99   | RBPT, MRT     | 0    | 99   | 0   | 0   | 0  |
|             |       |       |           |           | blood    | 532    | 52   | RBPT          | 0    | 52   | 0   | 0   | 0  |
|             | Oyo   | [104] | 2004-2006 | Cattle    | blood    | 1642   | 97   | RBPT          | 97   | 0    | 0   | 0   | 0  |
|             | Lagos | [105] | 2017      | Human     | blood    | 422    | 27   | RBPT, iELISA, | 27   | 0    | 0   | 0   | 0  |
|             | Lagos | [106] | 2009      | Cattle    | blood    | 479    | 41   | RBPT          | 41   | 0    | 0   | 0   | 0  |
|             | Oyo   | [107] | 2015      | Cattle    | blood    | 220    | 12   | RBPT          | 12   | 0    | 0   | 0   | 0  |
|             | Sw    | [108] | 2018      | Cattle    | blood    | 513    | 52   | RBPT, cELISA, | 0    | 52   | 0   | 0   | 0  |
|             |       |       |           |           | milk     | 635    | 130  | RBPT, iELISA, | 0    | 130  | 0   | 0   | 0  |
|             | Oyo   | [35]  | 2010      | Avian spp | blood    | 140    | 5    | RBPT          | 5    | 0    | 0   | 0   | 0  |
|             | Ogun  | [109] | 2011-2014 | Dogs      | blood    | 354    | 71   | RBPT, RSA     | 71   | 0    | 0   | 0   | 0  |
|             | Lagos | [109] | 2011-2014 | Dogs      | blood    | 385    | 84   | RBPT, RSA     | 84   | 0    | 0   | 0   | 0  |
|             | oyo   | [110] | 2004      | Cattle    | blood    | 1117   | 65   | RBPT          | 65   | 0    | 0   | 0   | 0  |
|             |       |       |           | Sheep     | blood    | 34     | 0    | RBPT          | 0    | 0    | 0   | 0   | 0  |
|             |       |       |           | Goat      | blood    | 466    | 4    | RBPT          | 4    | 0    | 0   | 0   | 0  |
|             |       |       |           | Pig       | blood    | 200    | 0    | RBPT          | 0    | 0    | 0   | 0   | 0  |
|             |       |       |           | Human     | blood    | 11     | 7    | RBPT          | 7    | 0    | 0   | 0   | 0  |
| Total       |       |       |           |           |          | 17240  | 1212 |               | 664  | 547  | 0   | 0   | 1  |
| Grand Total |       |       |           |           |          | 68,238 | 9101 |               | 7159 | 1384 | 361 | 162 | 35 |

**RBPT:** Rose Bengal Plate Test, **SAT:** Serum Agglutination Test, **cELISA:** competitive enzyme linked immunosorbent assay, **iELISA:** Indirect enzyme linked immunosorbent assay, **MRT:** Milk Ring Test, **CFT:** complement fixation test, **MSAT:** Microtiter Serum Agglutination Test, **IgM:** immunoglobulin M, **IgG:** immunoglobulin G, **IBCA:** Immunocomb WAT: Wright agglutination test **LFA:** Lateral flow assay **RSA:** Rapid slide test, **MAT:** Micro-agglutination test
